# Supplementary material for: Diverse metabolic reactions activated during 58-hr fasting are revealed by non-targeted metabolomic analysis of human blood
Source: PubMed Central journal article supplement (PMC6351603; doi:10.1038/s41598-018-36674-9), 2019-01-29
Supplement: 41598_2018_36674_MOESM1_ESM.pdf [file 41598_2018_36674_MOESM1_ESM.pdf]

## Supplementary information

### Diverse metabolic reactions activated during 58-hr fasting are revealed by non-targeted metabolomic analysis of human blood

Takayuki Teruya<sup>1</sup>, Romanas Chaleckis<sup>1,3</sup>, Junko Takada<sup>1</sup>, Mitsuhiro Yanagida<sup>1\*</sup> and Hiroshi Kondoh<sup>2\*</sup>

<sup>1</sup> G0 Cell Unit, Okinawa Institute of Science and Technology Graduate University (OIST), Okinawa, Japan,

<sup>2</sup> Geriatric unit, Department of Community Network and Collaborative Medicine, Graduate School of Medicine, Kyoto University, Kyoto, Japan

<sup>3</sup> Present address: Gunma University Initiative for Advanced Research (GIAR), Gunma University, Gunma, Japan.

\* To whom correspondence should be addressed: Co-corresponding authors.

**H. Kondoh**, Geriatric unit, Department of Community Network and Collaborative Medicine, Graduate School of Medicine, Kyoto University, Sakyo-ku, Kyoto, 606-8507, Japan

Fax & Tel +81 75 751 3465

Email; [hkondoh@kuhp.kyoto-u.ac.jp](mailto:hkondoh@kuhp.kyoto-u.ac.jp) Lead Contact

**M. Yanagida**, G0 Cell Unit, Okinawa Institute of Science and Technology Graduate University (OIST), Onna-son, Okinawa, 904-0495, Japan

Tel +81 98 966 8658 Fax +81 98 966 2890

Email; [myanagid@gmail.com](mailto:myanagid@gmail.com)

#### Supplemental Table S1. 120 identified blood metabolites. (Excel file)

120 identified metabolites were detected in blood metabolome samples by LC-MS. Compounds were identified using either commercially available standards (STD) or by analysis of MS/MS spectra (MS/MS), if no standard was available. H, M, and L indicate relative abundances of metabolites identified previously<sup>6,7</sup>. ND, not detected. 46 compounds that showed significant ( $p < 0.05$ ) increases ( $> 1.5x$ ) or decreases ( $< 0.66x$ ) are highlighted in yellow.

## Supplemental Table S2. The post hoc power analysis of the fasting markers.

The probability (p) value was calculated by the Friedman test. Effect size and power were calculated by post hoc analysis using G\*Power software (see Method section). NA, not applicable, due to non-significance ( $p > 0.05$ ).

| Compounds                 | Blood   |               |       | Plasma       |               |       | RBC     |               |       |
|---------------------------|---------|---------------|-------|--------------|---------------|-------|---------|---------------|-------|
|                           | p-value | effect size f | power | p-value      | effect size f | power | p-value | effect size f | power |
| 2-Hydroxybutyrate         | 0.0183  | 1.78          | 1.00  | 0.0388       | 2.08          | 1.00  | 0.0388  | 1.68          | 1.00  |
| 2-Ketobutyrate            | 0.0183  | 1.24          | 1.00  | 0.0183       | 1.05          | 1.00  | 0.0388  | 0.66          | 0.70  |
| 3-Hydroxybutyrate         | 0.0183  | 2.16          | 1.00  | 0.0183       | 2.14          | 1.00  | 0.0388  | 1.49          | 1.00  |
| Aminobutyrate             | 0.0183  | 2.04          | 1.00  | 0.0388       | 1.09          | 1.00  | 0.0183  | 1.34          | 1.00  |
| Isoleucine                | 0.0388  | 1.05          | 1.00  | 0.0388       | 0.92          | 0.97  | >0.05   | NA            | NA    |
| Keto(iso)leucine          | 0.0183  | 1.65          | 1.00  | 0.0183       | 2.17          | 1.00  | 0.0388  | 1.75          | 1.00  |
| Ketovaline                | 0.0183  | 1.89          | 1.00  | 0.0183       | 2.03          | 1.00  | 0.0388  | 1.49          | 1.00  |
| Leucine                   | 0.0388  | 1.21          | 1.00  | 0.0388       | 1.25          | 1.00  | >0.05   | NA            | NA    |
| Valine                    | >0.05   | NA            | NA    | 0.0388       | 1.01          | 0.99  | >0.05   | NA            | NA    |
| Acetyl-carnitine          | 0.0183  | 1.09          | 1.00  | 0.0183       | 2.38          | 1.00  | 0.0388  | 0.40          | 0.27  |
| Decanoyl-carnitine        | 0.0388  | 0.64          | 0.67  | 0.0183       | 0.85          | 0.94  | 0.0388  | 1.04          | 1.00  |
| Dodecanoyl-carnitine      | 0.0498  | 0.87          | 0.90  | 0.0183       | 1.08          | 1.00  | 0.0183  | 1.32          | 1.00  |
| Hexanoyl-carnitine        | 0.0388  | 0.58          | 0.56  | 0.0388       | 0.60          | 0.61  | 0.0388  | 0.89          | 0.96  |
| Isovaleryl-carnitine      | >0.05   | NA            | NA    | 0.0498       | 0.67          | 0.73  | 0.0388  | 0.38          | 0.25  |
| Octanoyl-carnitine        | 0.0388  | 1.28          | 1.00  | 0.0388       | 0.83          | 0.93  | 0.0498  | 1.10          | 1.00  |
| Tetradecanoyl-carnitine   | 0.0498  | 0.69          | 0.76  | 0.0183       | 0.85          | 0.94  | 0.0183  | 0.96          | 0.99  |
| 2-Oxoglutarate            | 0.0183  | 1.23          | 1.00  | 0.0388       | 0.89          | 0.96  | >0.05   | 0.59          | 0.58  |
| cis-Aconitate             | >0.05   | NA            | NA    | 0.0183       | 1.24          | 1.00  | >0.05   | NA            | NA    |
| Citrate                   | >0.05   | NA            | NA    | 0.0388       | 0.98          | 0.99  | >0.05   | NA            | NA    |
| Malate                    | 0.0388  | 0.88          | 0.96  | 0.0388       | 0.66          | 0.70  | 0.0498  | 0.54          | 0.50  |
| Succinate                 | >0.05   | NA            | NA    | 0.0388       | 0.99          | 0.99  | >0.05   | NA            | NA    |
| Nicotinamide              | 0.0388  | 0.95          | 0.98  | 0.0388       | 0.58          | 0.56  | 0.0388  | 0.98          | 0.99  |
| Pantothenate              | 0.0498  | 0.42          | 0.30  | 0.0388       | 0.70          | 0.77  | >0.05   | NA            | NA    |
| Adenine                   | >0.05   | NA            | NA    | >0.05        | NA            | NA    | 0.0183  | 1.13          | 1.00  |
| ADP                       | 0.0388  | 0.73          | 0.82  | >0.05        | NA            | NA    | >0.05   | NA            | NA    |
| CTP                       | >0.05   | NA            | NA    | 0.0388       | 0.43          | 0.32  | >0.05   | NA            | NA    |
| Cytidine                  | >0.05   | NA            | NA    | 0.0388       | 0.51          | 0.43  | 0.0388  | 1.04          | 0.98  |
| GTP                       | >0.05   | NA            | NA    | 0.0183       | 0.75          | 0.83  | >0.05   | NA            | NA    |
| IMP                       | >0.05   | NA            | NA    | 0.0183       | 0.62          | 0.64  | >0.05   | NA            | NA    |
| Urate                     | 0.0388  | 1.20          | 1.00  | >0.05        | NA            | NA    | 0.0388  | 0.83          | 0.93  |
| Uridine                   | 0.0388  | 1.52          | 1.00  | 0.0388       | 1.19          | 1.00  | 0.0498  | 1.20          | 1.00  |
| Xanthine                  | 0.0388  | 0.59          | 0.58  | 0.0388       | 0.52          | 0.46  | 0.0388  | 0.56          | 0.52  |
| 6-Phosphogluconate        | >0.05   | NA            | NA    | 0.0388       | 0.35          | 0.21  | >0.05   | NA            | NA    |
| Diphospho-glycerate       | 0.0388  | 0.66          | 0.70  | 0.0388       | 1.99          | 1.00  | >0.05   | NA            | NA    |
| Gluconate                 | >0.05   | NA            | NA    | 0.0388       | 0.73          | 0.81  | >0.05   | NA            | NA    |
| Glucose-6-phosphate       | >0.05   | NA            | NA    | 0.0388       | 0.83          | 0.93  | >0.05   | NA            | NA    |
| Glycerol-phosphate        | 0.0498  | 0.79          | 0.89  | 0.0498       | 0.68          | 0.73  | >0.05   | NA            | NA    |
| Pentose-phosphate         | >0.05   | NA            | NA    | 0.0498       | 0.83          | 0.92  | >0.05   | NA            | NA    |
| Sedoheptulose-7-phosphate | >0.05   | NA            | NA    | 0.0388       | 0.75          | 0.85  | >0.05   | NA            | NA    |
| Ergothioneine             | 0.0498  | 0.18          | 0.09  | 0.0183       | 0.25          | 0.13  | 0.0388  | 0.20          | 0.10  |
| Ophthalmic acid           | 0.0183  | 3.31          | 1.00  | not detected |               |       | 0.0183  | 1.81          | 1.00  |
| Carnosine                 | >0.05   | NA            | NA    | not detected |               |       | 0.0183  | 0.44          | 0.33  |
| Aspartate                 | >0.05   | NA            | NA    | 0.0388       | 0.92          | 0.98  | >0.05   | NA            | NA    |
| Dimethyl-arginine         | >0.05   | NA            | NA    | 0.0388       | 0.68          | 0.73  | 0.0388  | 0.87          | 0.95  |
| Lysine                    | 0.0388  | 0.84          | 0.93  | 0.0388       | 0.67          | 0.72  | >0.05   | NA            | NA    |
| N-Acetyl-(iso)leucine     | >0.05   | NA            | NA    | 0.0388       | 0.87          | 0.95  | 0.0388  | 0.88          | 0.96  |

**Supplemental Table S3. Standards for peak identification.**

Previously reported standards and their vendors are found in Pluskal et al.<sup>12</sup> or Chaleckis et al.<sup>6,7</sup>

| Compound          | Vendor        | Product name                               | Catalog # |
|-------------------|---------------|--------------------------------------------|-----------|
| 2-Hydroxybutyrate | Sigma-Aldrich | 2-Hydroxybutyric acid sodium salt          | 220116-5G |
| 2-Ketobutyrate    | Sigma-Aldrich | 2-Ketobutyric acid                         | K401-5G   |
| 3-Hydroxybutyrate | Sigma-Aldrich | 3-Hydroxybutyric acid                      | 166898-1G |
| Aminobutyrate     | Wako          | DL-2-Aminobutyric acid                     | 015-14542 |
|                   | Wako          | DL-3-Aminobutyric acid                     | 019-02411 |
|                   | TCI           | DL-3-Aminoisobutyric Acid Hydrate          | A0324     |
| Keto(iso)leucine  | Sigma-Aldrich | (±)-3-Methyl-2-oxovaleric acid sodium salt | K7125-5G  |
|                   | Sigma-Aldrich | 4-Methyl-2-oxovaleric acid                 | 68255-1G  |
| Ketovaline        | Combi-Blocks  | 3-Methyl-2-oxo-butanoic acid               | ST-4537   |

**Supplemental Table S4. Methods and parameters used for data processing with MZmine 2.21.**

|                                                                                                                                        |                       |
|----------------------------------------------------------------------------------------------------------------------------------------|-----------------------|
| <b>1. Raw data methods / Raw data file import</b>                                                                                      |                       |
| Filename                                                                                                                               | choose all data files |
| <b>2. Raw data methods / Peak detection / Mass detection</b>                                                                           |                       |
| Mass detection, mass detector                                                                                                          | Exact mass            |
| Noise level (positive ionization mode)                                                                                                 | 5E3                   |
| Noise level (negative ionization mode)                                                                                                 | 1E3                   |
| Mass detection, MS level                                                                                                               | 1                     |
| <b>3. Raw data methods / Peak detection / FTMS shoulder peaks filter</b>                                                               |                       |
| Mass resolution                                                                                                                        | 60,000                |
| Peak model function                                                                                                                    | Lorentzian extended   |
| <b>4. Raw data methods / Peak detection / Chromatogram builder</b>                                                                     |                       |
| Min time span (min)                                                                                                                    | 0.1                   |
| Min height                                                                                                                             | 1E4                   |
| m/z tolerance                                                                                                                          | 0.003 m/z or 10 ppm   |
| <b>5. Peak list methods / Peak detection / Smoothing</b>                                                                               |                       |
| Filter width                                                                                                                           | 5                     |
| <b>6. Peak list methods / Peak detection / Chromatogram deconvolution</b>                                                              |                       |
| Algorithm                                                                                                                              | Local minimum search  |
| Chromatographic threshold                                                                                                              | 70%                   |
| Search minimum in RT range (min)                                                                                                       | 0.3                   |
| Minimum relative height                                                                                                                | 1%                    |
| Minimum absolute height                                                                                                                | 1E4                   |
| Min ratio of peak top/edge                                                                                                             | 1.5                   |
| Peak duration range (min)                                                                                                              | 0-10                  |
| <b>7. Peak list methods / Isotopes / Isotope peak grouper</b>                                                                          |                       |
| m/z tolerance                                                                                                                          | 0.02 m/z or 20 ppm    |
| Retention time tolerance                                                                                                               | 0.1 min               |
| Maximum charge                                                                                                                         | 2                     |
| Representative isotope                                                                                                                 | Most intense          |
| <b>8. Peak list methods / Alignment / Join aligner (run separately for negative ionization mode and positive ionization mode data)</b> |                       |
| m/z tolerance                                                                                                                          | 0.003 m/z or 10 ppm   |
| Weight for m/z                                                                                                                         | 10                    |
| Retention time tolerance                                                                                                               | 0.5 min               |
| Weight for RT                                                                                                                          | 10                    |
| <b>9. Peak list methods / Gap filling / Same RT and m/z range filling</b>                                                              |                       |
| m/z tolerance                                                                                                                          | 0.003 m/z or 10 ppm   |
| <b>10. Peak list methods / Identification / Custom database search</b>                                                                 |                       |
| (custom CSV database of previously identified compounds was used)                                                                      |                       |

## Plasma

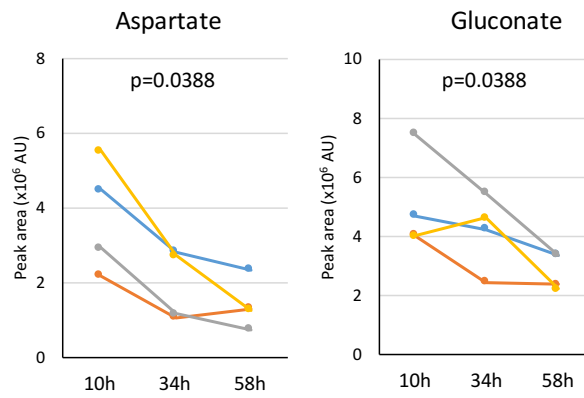

**Supplemental Figure S1. Aspartate and gluconate decreased <0.66x in plasma during fasting.** Changes of aspartate and gluconate in peak area were observed in plasma samples of four volunteers. P-values are presented to show the significance of serial change until 58 hr by Friedman test.

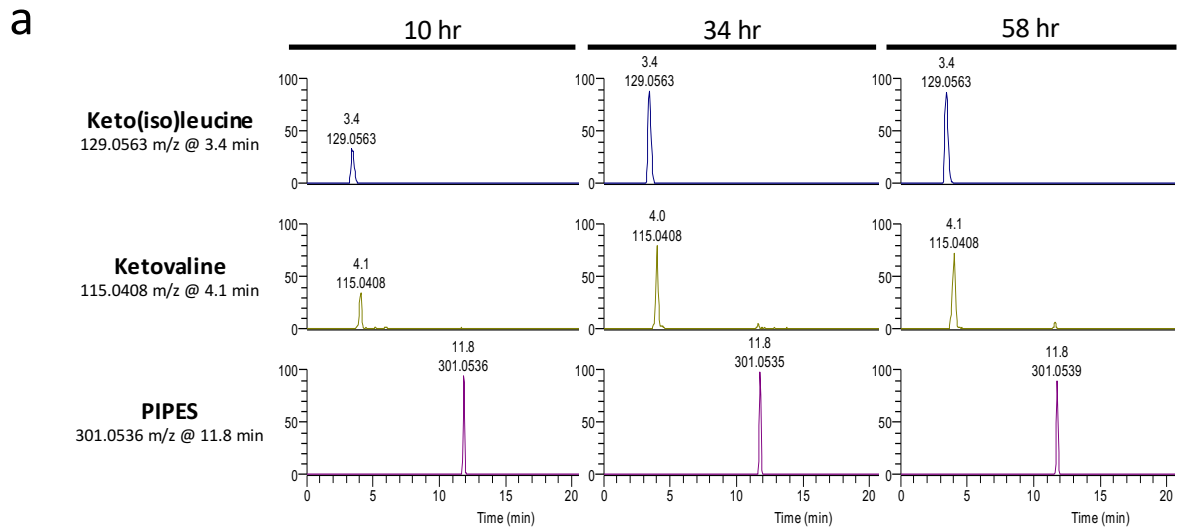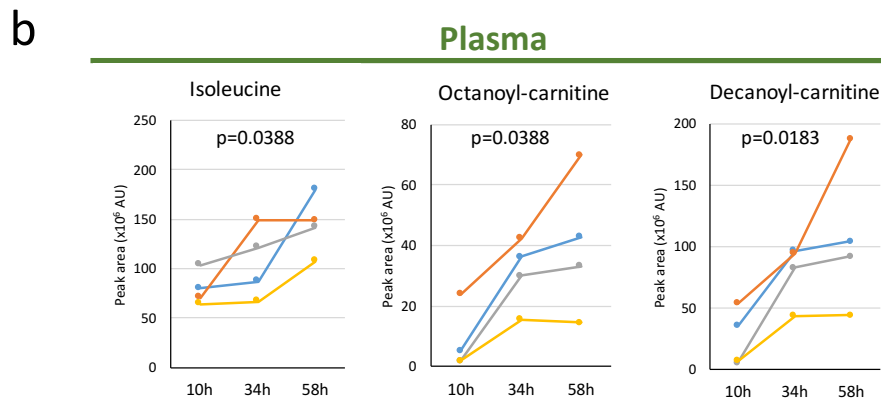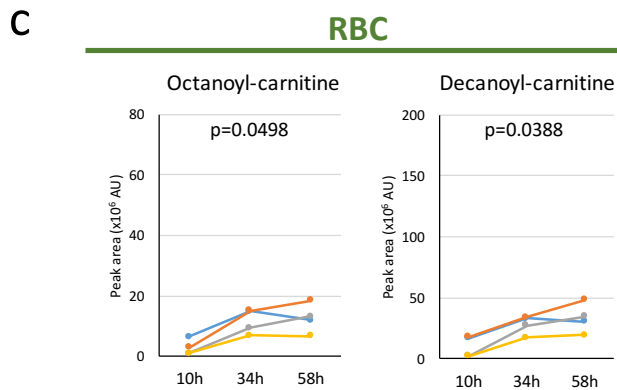

**Supplemental Figure S2. Increases of BCAAs and carnitines during fasting.**

(a) Peaks of keto(iso)leucine and ketovaline increased significantly during 58 hr of fasting. PIPES was used as an internal control. (b, c) Concentration changes of previously known fasting metabolite markers, isoleucine, valine, octanoyl-, and decanoyl-carnitine, as determined by LC-MS. Profiles in plasma (b) and in RBCs (c) are shown. In each panel, p-values were obtained by Friedman test.



Volunteer 1

| Compounds                  | change<br>34 h/10 h |
|----------------------------|---------------------|
| 3-Hydroxybutyrate          | 25.40               |
| Octanoyl-carnitine         | 11.66               |
| 2-Ketobutyrate             | 10.07               |
| 2-Hydroxybutyrate          | 6.56                |
| Hypoxanthine               | 3.69                |
| Adenine                    | 3.42                |
| Ketovaline                 | 2.93                |
| Glyceric acid              | 2.81                |
| Dodecanoyl-carnitine       | 2.67                |
| Uridine                    | 2.57                |
| Keto(iso)leucine           | 2.57                |
| Glyceraldehyde-3-phosphate | 2.56                |
| Ophthalmic acid            | 2.53                |
| Nicotinamide               | 2.51                |
| Xanthine                   | 2.48                |

| Compounds                  | change<br>58 h/10 h |
|----------------------------|---------------------|
| 3-Hydroxybutyrate          | 65.56               |
| 2-Ketobutyrate             | 16.03               |
| 2-Hydroxybutyrate          | 11.85               |
| Octanoyl-carnitine         | 8.74                |
| Adenine                    | 7.32                |
| Ophthalmic acid            | 4.45                |
| Dodecanoyl-carnitine       | 3.67                |
| Keto(iso)leucine           | 3.57                |
| Ketovaline                 | 3.46                |
| Glyceric acid              | 3.45                |
| Hypoxanthine               | 3.43                |
| Aminobutyrate              | 3.37                |
| Glyceraldehyde-3-phosphate | 3.37                |
| Uridine                    | 3.30                |
| Tetradecanoyl-carnitine    | 3.12                |



Volunteer 2

|                         |       |
|-------------------------|-------|
| 3-Hydroxybutyrate       | 24.75 |
| 2-Hydroxybutyrate       | 11.74 |
| 2-Ketobutyrate          | 9.42  |
| Tetradecanoyl-carnitine | 4.12  |
| Leucine                 | 3.51  |
| Ketovaline              | 3.15  |
| Valine                  | 3.04  |
| Isoleucine              | 2.90  |
| N-Acetyl-glutamate      | 2.90  |
| Dodecanoyl-carnitine    | 2.89  |
| Xanthine                | 2.80  |
| 2-Oxoglutarate          | 2.67  |
| Keto(iso)leucine        | 2.67  |
| Octanoyl-carnitine      | 2.65  |
| Ophthalmic acid         | 2.54  |

|                         |       |
|-------------------------|-------|
| 3-Hydroxybutyrate       | 25.08 |
| 2-Ketobutyrate          | 12.71 |
| 2-Hydroxybutyrate       | 12.50 |
| Aminobutyrate           | 5.54  |
| N-Acetyl-glutamate      | 5.51  |
| Ophthalmic acid         | 3.68  |
| Ketovaline              | 3.55  |
| Tetradecanoyl-carnitine | 3.55  |
| 2-Oxoglutarate          | 3.26  |
| Octanoyl-carnitine      | 3.20  |
| Keto(iso)leucine        | 2.98  |
| Dodecanoyl-carnitine    | 2.83  |
| Leucine                 | 2.71  |
| Xanthine                | 2.67  |
| Valine                  | 2.58  |



Volunteer 3

|                         |       |
|-------------------------|-------|
| 3-Hydroxybutyrate       | 20.02 |
| Decanoyl-carnitine      | 16.92 |
| Tetradecanoyl-carnitine | 13.18 |
| Octanoyl-carnitine      | 12.42 |
| Dodecanoyl-carnitine    | 10.86 |
| 2-Hydroxybutyrate       | 4.90  |
| Xanthine                | 4.75  |
| Uridine                 | 3.53  |
| Hexanoyl-carnitine      | 2.84  |
| 2-Ketobutyrate          | 2.72  |
| Keto(iso)leucine        | 2.44  |
| Ketovaline              | 2.37  |
| Adenine                 | 2.35  |
| Hypoxanthine            | 2.28  |
| Cytidine                | 2.05  |

|                         |       |
|-------------------------|-------|
| 3-Hydroxybutyrate       | 73.10 |
| Decanoyl-carnitine      | 9.68  |
| 2-Hydroxybutyrate       | 8.79  |
| Octanoyl-carnitine      | 8.13  |
| Tetradecanoyl-carnitine | 8.03  |
| Aminobutyrate           | 7.63  |
| Dodecanoyl-carnitine    | 6.77  |
| 2-Ketobutyrate          | 6.39  |
| Xanthine                | 5.35  |
| Uridine                 | 3.65  |
| Adenine                 | 3.48  |
| Ketovaline              | 2.66  |
| Keto(iso)leucine        | 2.60  |
| Ophthalmic acid         | 2.43  |
| Hexanoyl-carnitine      | 1.92  |



Volunteer 4

|                         |      |
|-------------------------|------|
| 3-Hydroxybutyrate       | 9.45 |
| Tetradecanoyl-carnitine | 8.65 |
| Decanoyl-carnitine      | 6.12 |
| Octanoyl-carnitine      | 5.46 |
| 2-Hydroxybutyrate       | 5.15 |
| 2-Ketobutyrate          | 4.73 |
| Dodecanoyl-carnitine    | 4.11 |
| Xanthine                | 3.93 |
| Uridine                 | 2.46 |
| Keto(iso)leucine        | 2.15 |
| Hexanoyl-carnitine      | 2.12 |
| Ketovaline              | 2.06 |
| Ophthalmic acid         | 1.75 |
| Urate                   | 1.58 |
| Aminobutyrate           | 1.57 |

|                         |       |
|-------------------------|-------|
| 3-Hydroxybutyrate       | 68.06 |
| 2-Hydroxybutyrate       | 22.21 |
| 2-Ketobutyrate          | 15.63 |
| Tetradecanoyl-carnitine | 12.27 |
| Decanoyl-carnitine      | 5.75  |
| Dodecanoyl-carnitine    | 5.65  |
| Xanthine                | 5.13  |
| Octanoyl-carnitine      | 4.39  |
| Keto(iso)leucine        | 4.36  |
| Ketovaline              | 4.03  |
| Ophthalmic acid         | 3.67  |
| Aminobutyrate           | 3.37  |
| Uridine                 | 2.99  |
| Acetyl-carnitine        | 2.36  |
| Isoleucine              | 2.12  |

### Supplemental Figure S3. Individual variation in fasting responses.

Fifteen metabolites that changed most significantly in four volunteers are listed, arranged in order of their degree of change. Butyrates are shown in red, while acylcarnitines and BCAAs are in green and blue, respectively. Left panels are comparison of levels between 10 and 34 hr in each volunteer, while comparison of those between 10 and 58 hr of fasting are shown in right panels.

**a****Blood**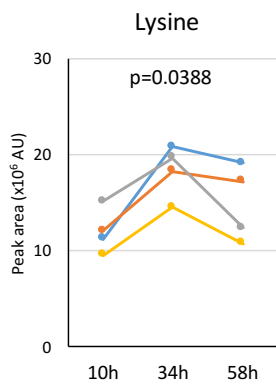**b****RBC**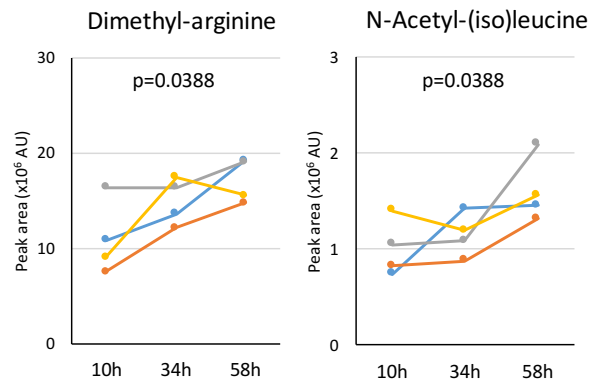

**Supplemental Figure S4. Lysine concentration increased in whole blood and two amino acid derivatives increased in RBCs during fasting.**

(a) Lysine displayed significant changes in whole blood. (b) Dimethyl-arginine and N-acetyl-(iso)leucine increased during fasting in RBCs. In each panel, p-values were obtained by Friedman test.
